# Supplementary material
Source: PubMed Central journal article supplement (PMC3421618)

# Supplementary Figure 1

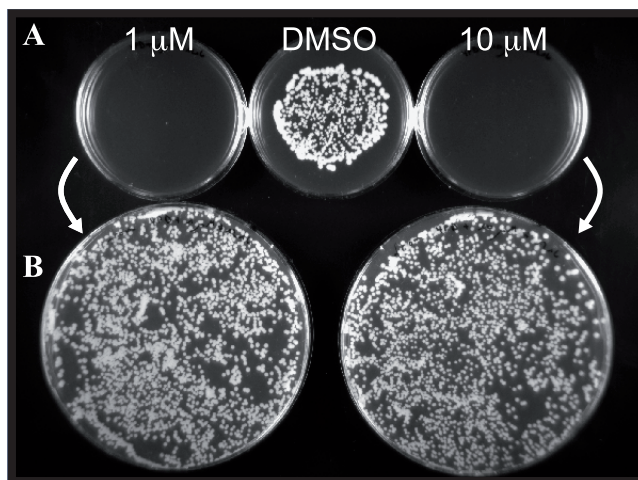

Supplement: AAC.06332-11_zac999101094so2.pdf [file AAC.06332-11_zac999101094so2.pdf]

Supplementary Figure 3

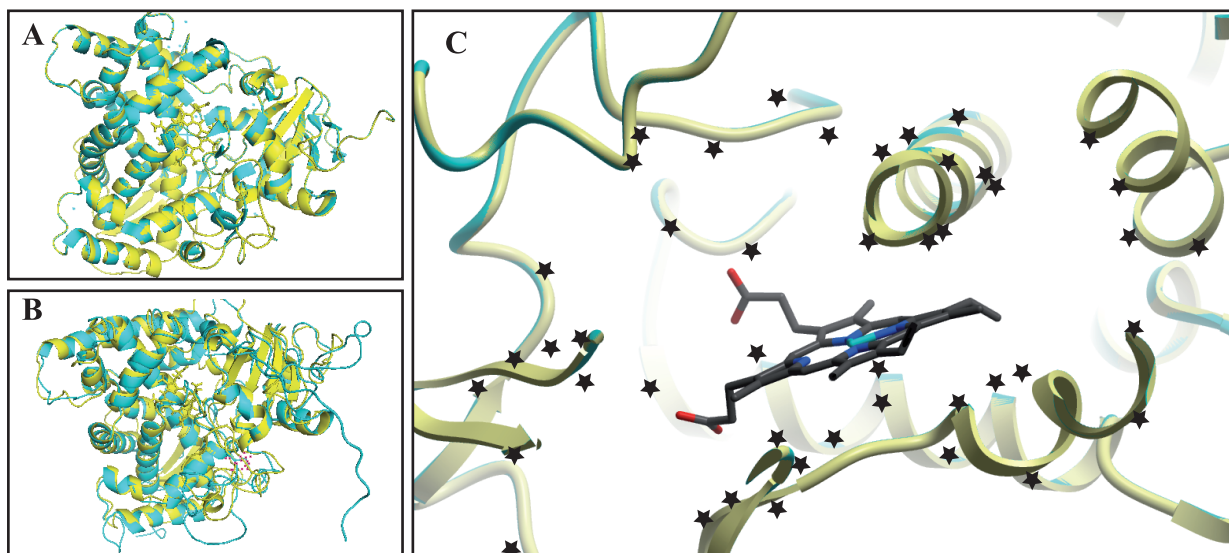

Supplement: AAC.06332-11_zac999101094so4.pdf [file AAC.06332-11_zac999101094so4.pdf]
